# THE AMERICAN JOURNAL OF PSYCHIATRY

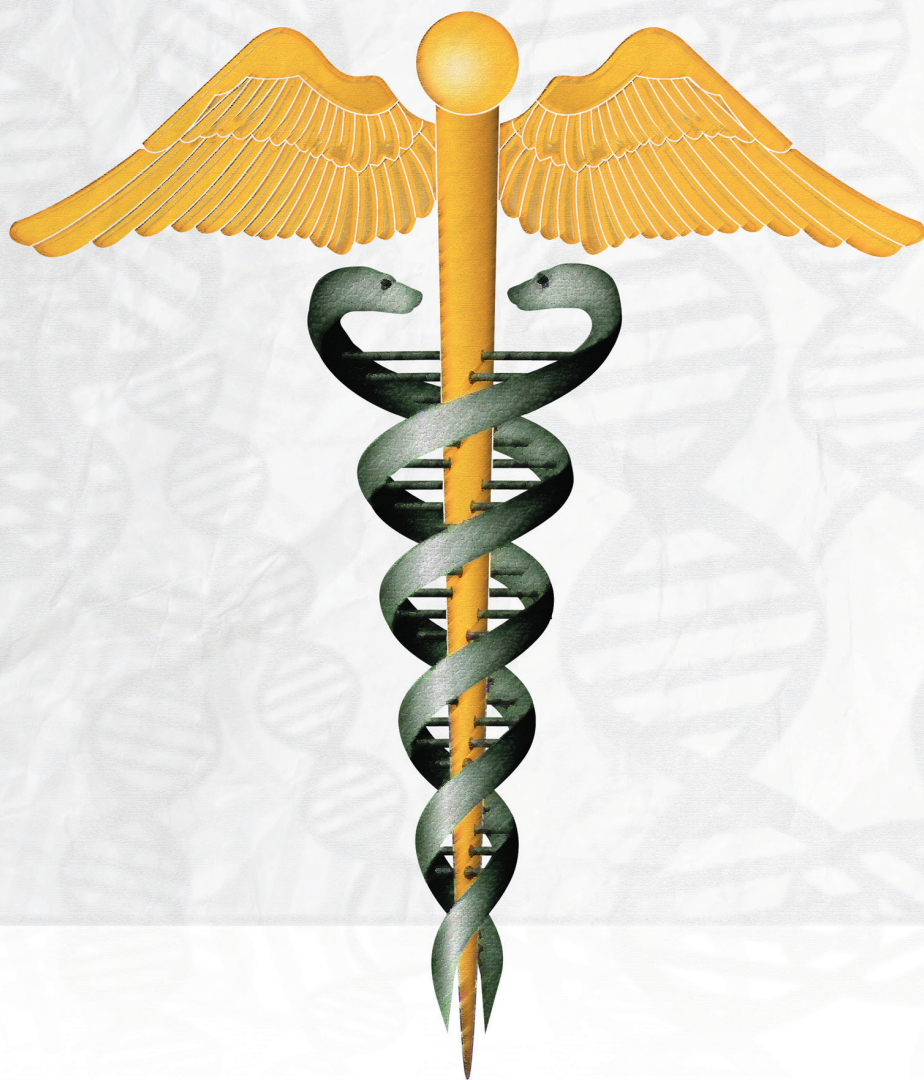

**Anti-NMDA Receptor Encephalitis:  
Diagnosis, Psychiatric  
Presentation, and Treatment**

Meredith R. Chapman, M.D., and  
Holly E. Vause, D.N.P., P.M.H.N.P.-B.C. 245

**Relationship of Personality  
Disorders to the Course of Major  
Depressive Disorder in a  
Nationally Representative Sample**

Andrew E. Skodol, M.D., et al. 257

◀ **Pharmacogenetic Approach at  
the Serotonin Transporter Gene  
as a Method of Reducing the  
Severity of Alcohol Drinking**

Bankole A. Johnson, D.Sc., M.D., et al. 265

**Copy Number Variants in  
Schizophrenia: Confirmation of  
Five Previous Findings and New  
Evidence for 3q29 Microdeletions  
and VIPR2 Duplications**

Douglas F. Levinson, M.D., et al. 302

**Continuing Medical Education 337**

**March 2011**

**Volume 168 • Number 3**

Official Journal of the  
AMERICAN PSYCHIATRIC ASSOCIATION

[ajp.psychiatryonline.org](http://ajp.psychiatryonline.org)
